# Supplementary material
Source: MDPI journal article supplement (https://www.mdpi.com/2071-1050/13/2/529)
Supplement: s1 [file s1]

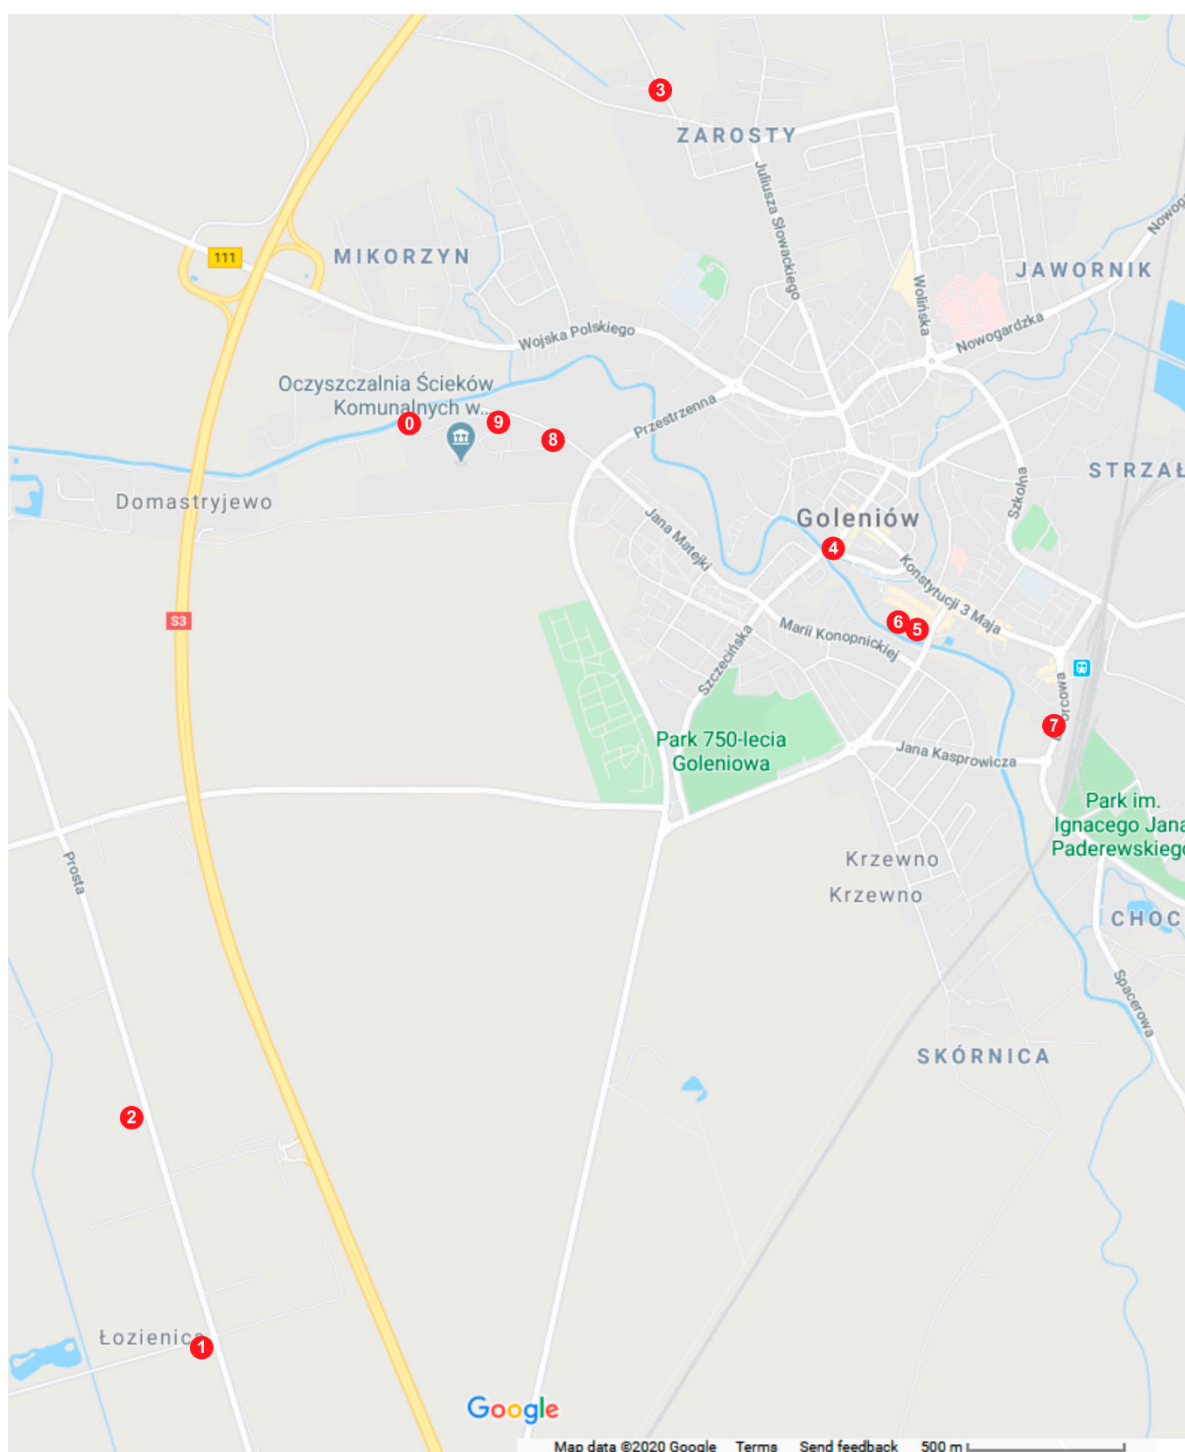

**Figure S1.** Map of the location of the sampling sites in Poland.

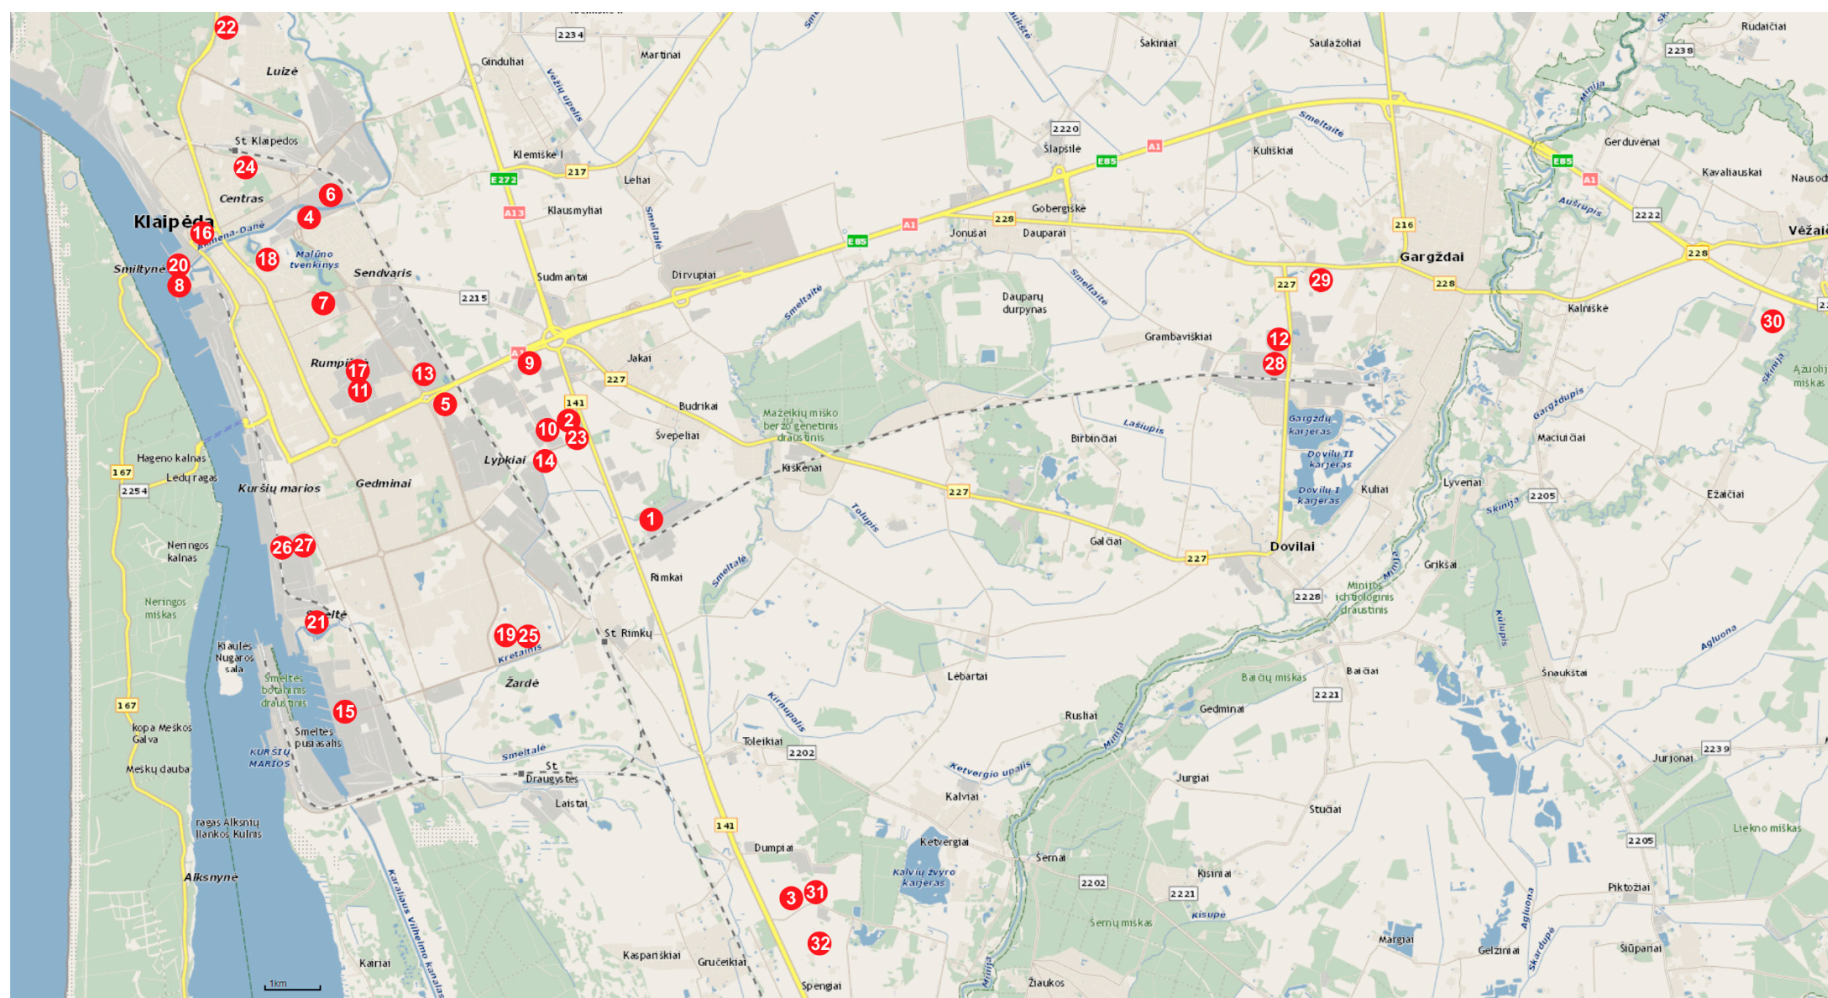

Figure S2. Map of the location of the sampling sites in Lithuania.

Table S1. Sampling site description.

| Samples | Sampling points                                                                                                                               |                                                                                                                    |                                               |
|---------|-----------------------------------------------------------------------------------------------------------------------------------------------|--------------------------------------------------------------------------------------------------------------------|-----------------------------------------------|
|         | Lithuania                                                                                                                                     | Poland                                                                                                             | Denmark                                       |
| Water   | No 1. PET factory                                                                                                                             |                                                                                                                    |                                               |
|         | No 2. PET factory                                                                                                                             |                                                                                                                    |                                               |
|         | No 3. Klaipeda region landfill                                                                                                                |                                                                                                                    |                                               |
|         | No 4. Furniture production                                                                                                                    |                                                                                                                    |                                               |
|         | No 5. Shopping Center I (samples have been taken from the sewer hatches where the mix of pipes from various centre's activities are coming)   |                                                                                                                    |                                               |
|         | No 6. Wood processing                                                                                                                         | No 0. Treated sewage from Goleniów sewage treatment plant (outlet)                                                 |                                               |
|         | No 7. Laundry services                                                                                                                        | No 1. Sewage pumping station Source: cosmetics company, concrete plant, catering, laundry, processing of furskins. |                                               |
|         | No 8. Cruise ship terminal                                                                                                                    | No 2. Sewage pumping station Source: restaurants, café.                                                            |                                               |
|         | No 9. Tobacco Factory                                                                                                                         | No 3. Manhole. Sewage from: fast-food restaurant, gas station, kindergarten.                                       | No 1. Inlet of the Rønne WWTP                 |
|         | No 10. Fish processing                                                                                                                        | No 4. Manhole. Sewage from: restaurants, hairdresser, beautician.                                                  | No 2. Outlet of the Rønne WWTP                |
|         | No 11. Shopping center II (samples have been taken from the sewer hatches where the mix of pipes from various centre's activities are coming) | No 5. Manhole. Source: restaurants, café.                                                                          | Rønne WWTP (address: Skansevej 2, 3700 Rønne) |
|         | No 12. Food factory                                                                                                                           | No 6. Sewage pumping station Source: supermarket, market, restaurants, café.                                       |                                               |
|         | No 13. Bread Factory                                                                                                                          | No 7. Manhole. Source: shopping center, production of cardboard packaging, train station.                          |                                               |
|         | No 14. Biodiesel production plant                                                                                                             | No 8. Manhole on the sewage treatment plant. Source: all Industrial Park.                                          |                                               |
|         | No 15. Energy supply, maintenance and repair services                                                                                         | No 9. Raw sewage Goleniów sewage treatment plant (inlet). Source: Goleniów town and commune (inlet)                |                                               |
|         | No 16. Hotel                                                                                                                                  |                                                                                                                    |                                               |
|         | No 17. Concrete production                                                                                                                    |                                                                                                                    |                                               |
|         | No 18. Bear factory                                                                                                                           |                                                                                                                    |                                               |
|         | No 19. Domestic sewage                                                                                                                        |                                                                                                                    |                                               |
|         | No 20. Sewage pumping station II                                                                                                              |                                                                                                                    |                                               |
|         | No 21. Sewage pumping station VI                                                                                                              |                                                                                                                    |                                               |
|         | No 22. Sewage pumping station XVII                                                                                                            |                                                                                                                    |                                               |
|         | No 23. Sewage pumping station XIX                                                                                                             |                                                                                                                    |                                               |
|         | No 24. Klaipeda Republican Hospital                                                                                                           |                                                                                                                    |                                               |
|         | No 25. Kindergarten                                                                                                                           |                                                                                                                    |                                               |
|         | No 26. Truck wash services                                                                                                                    |                                                                                                                    |                                               |
|         | No 27. Publishing-printing house                                                                                                              |                                                                                                                    |                                               |
|         | No 28. Sewage pumping station in Gargzdai II                                                                                                  |                                                                                                                    |                                               |
|         | No 29. Care home                                                                                                                              |                                                                                                                    |                                               |
|         | No 30. District WWTP                                                                                                                          |                                                                                                                    |                                               |
|         | No 31. Klaipeda WWTP outlet                                                                                                                   |                                                                                                                    |                                               |
|         | No 32. Klaipeda WWTP inlet                                                                                                                    |                                                                                                                    |                                               |
